# Supplementary material for: Two-dimensional free-energy surface on the exchange reaction of alkyl chloride/chloride using the QM/MM-MC method
Source: Royal Society of Chemistry journal article supplement (doi:10.1039/b712565h), 2007-12-05
Supplement: b712565h.pdf [file b712565h.pdf]

## Supplementary Material

Paper ref.: B712565H

Title: Two-Dimensional Free Energy Surface on Exchange Reaction of Alkyl  
Chloride/Chloride Using QM/MM-MC Method

Listed below are the coordinates and the total energies of the reactant/product and the TS structure along the gas-phase IRC for each of Cl/Cl exchange reactions of R-Cl ((a) R=Me, (b) *t*-Bu) in Fig.1 at the theoretical level of HF/6-31G\*.

### (a) R=Me

(a-1) reactant/product ( $C_{3v}$ )                      Total Energy = -958.635496420a.u.

|    |           |           |           |
|----|-----------|-----------|-----------|
| C  | 0.000000  | 0.000000  | 0.000000  |
| H  | 0.000000  | 1.020361  | 0.331661  |
| H  | -0.883659 | -0.510181 | 0.331661  |
| H  | 0.883659  | -0.510181 | 0.331661  |
| Cl | 0.000000  | 0.000000  | 3.265616  |
| Cl | 0.000000  | 0.000000  | -1.827737 |

(a-2) TS                      ( $D_{3h}$ )                      Total Energy = -958.613461467a.u.

|    |           |           |           |
|----|-----------|-----------|-----------|
| C  | 0.000000  | 0.000000  | 0.000000  |
| H  | 0.000000  | 1.061242  | 0.000000  |
| H  | 0.919063  | -0.530621 | 0.000000  |
| H  | -0.919063 | -0.530621 | 0.000000  |
| Cl | 0.000000  | 0.000000  | 2.382389  |
| Cl | 0.000000  | 0.000000  | -2.382389 |

**(b) R=*t*-Bu**

| (b-1) reactant/product (C <sub>3v</sub> ) | Total Energy = -1075.75273062a.u. |           |           |
|-------------------------------------------|-----------------------------------|-----------|-----------|
| C                                         | 0.000000                          | 0.000000  | 0.000000  |
| C                                         | 0.000000                          | 1.453080  | 0.448628  |
| C                                         | -1.258404                         | -0.726540 | 0.448628  |
| C                                         | 1.258404                          | -0.726540 | 0.448628  |
| H                                         | 0.000000                          | 1.467016  | 1.533605  |
| H                                         | 0.880186                          | 1.971590  | 0.083919  |
| H                                         | -0.880186                         | 1.971590  | 0.083919  |
| H                                         | -1.270473                         | -0.733508 | 1.533605  |
| H                                         | -2.147541                         | -0.223532 | 0.083919  |
| H                                         | -1.267354                         | -1.748059 | 0.083919  |
| H                                         | 1.270473                          | -0.733508 | 1.533605  |
| H                                         | 1.267354                          | -1.748059 | 0.083919  |
| H                                         | 2.147541                          | -0.223532 | 0.083919  |
| Cl                                        | 0.000000                          | 0.000000  | -1.877779 |
| Cl                                        | 0.000000                          | 0.000000  | 4.008340  |

Supplementary data for *Physical Chemistry Chemical Physics*  
This journal is © The Owner Societies 2007

| (b-2) C <sub>3h</sub> structure |           | Total Energy = -1075.71663073a.u. |           |
|---------------------------------|-----------|-----------------------------------|-----------|
| C                               | 0.000000  | 0.000000                          | 0.000000  |
| C                               | 0.020047  | 0.000000                          | 1.484338  |
| C                               | 1.275451  | 0.000000                          | -0.759530 |
| C                               | -1.295498 | 0.000000                          | -0.724808 |
| H                               | 1.027422  | 0.000000                          | 1.874587  |
| H                               | -0.501871 | 0.888624                          | 1.813169  |
| H                               | -0.501871 | -0.888624                         | 1.813169  |
| H                               | 1.109729  | 0.000000                          | -1.827067 |
| H                               | 1.821186  | 0.888624                          | -0.471951 |
| H                               | 1.821186  | -0.888624                         | -0.471951 |
| H                               | -2.137151 | 0.000000                          | -0.047520 |
| H                               | -1.319315 | 0.888624                          | -1.341218 |
| H                               | -1.319315 | -0.888624                         | -1.341218 |
| Cl                              | 0.000000  | -2.985943                         | 0.000000  |
| Cl                              | 0.000000  | 2.985943                          | 0.000000  |
